# Human origin and migration deciphered from a novel genomic footprints of mitochondrial sequences

Aritra Mahapatra<sup>1</sup>, Jayanta Mukherjee<sup>2</sup>

Department of Computer Science and Engineering,  
Indian Institute of Technology, Kharagpur, India, 721302

1 aritra.mhp@iitkgp.ac.in

2 jay@cse.iitkgp.ac.in

## 1 Abstract

2 The origin of modern human and their migration across the world is one of the most  
3 debated topics for the decades. There exist two different hypotheses, recent African  
4 origin and multi-regional evolution, based on the genomic studies, haplogroups, archae-  
5 ological records, cultural behaviors, palaeontology studies, etc. Various studies placed  
6 the modern humans in a phylogenetic tree to depict the relationships among them.  
7 The debate for determining those regions of Africa which witnessed the first origin  
8 of humans still exists. The conflicts between the results obtained from the molecular  
9 data and the archaeological and palaeontological reports still exist. We adopt a novel  
10 genomic feature derived from the whole mitochondrial sequence, and using a novel  
11 distance function the phylogenetic trees are constructed based on the feature which  
12 provide a new insight on human migration. We propose a new method to derive the  
13 bootstrap replica from the genome sequences by considering the genetic variance to  
14 demonstrate the robustness of the obtained trees. The results derived from the ge-  
15 nomic feature are more consistent with the archaeological findings based on the time  
16 of origin of different communities. We find that west and central African communities  
17 are placed at the basal point with a very high bootstrap score. This study roughly  
18 estimates the existence of the archaic human at 800-900 kilo years ago and presence of  
19 human in Africa at 600-700 kilo years ago. This supports the presence of an ancestor  
20 in the west and central Africa much earlier than that of the fossils identified.

**Keywords:** Human migration, modern humans, mitochondrial genome, graphical representation, graphical footprint, drift

# 1 Introduction

The origin of the anatomically modern humans (AMH) and their migration into the world is being studied extensively. The multiple genetic admixtures due to migration, intermarriage, slavery, human trafficking etc. played an important role to make the human history very complex (Duda and Zrzavý, 2016; Mellars, 2006). Apart from that, different assumptions such as gene flow (Shriner et al., 2016), make the study of human evolution and migration more complex (Bae et al., 2017).

Broadly, there exist two hypotheses of human evolution and migration. The “recent African origin” or “replacement” hypothesis (Chan et al., 2019; Cann et al., 1987; Vigilant et al., 1991) states that the already existing anatomically modern humans subsequently replace the ancient humans and spread all over the world (Liu et al., 2006; Stringer, 2003; Wolpoff et al., 2000). There are various methods incorporated to describe the history of the humans. Several genomic studies (Mondal et al., 2019; Browning et al., 2018; Mondal et al., 2016) supported the “replacement” hypothesis. This hypothesis proposes that there is no or very less admixture or genetic mixing between AMH and the archaic humans throughout the world. But this hypothesis is negated by some recent studies (Mafessoni, 2019; Prüfer et al., 2014). Alternatively, the “multi-regional” hypothesis (Cartmill and Smith, 2009) states that the evolution of the archaic human occurred in different parts of the world. This evolution ended up with the AMH. Several linguistic analysis (Baker et al., 2017; Balter, 2019), and cultural analysis (Bhugra and Becker, 2005; Mesoudi, 2018) support the “multi-regional” hypothesis.

Though various genomic studies were conducted for searching the origin of humans, most of the studies focused on the phylogenetic tree derived from alignment based methods (Mondal et al., 2019; Jinam et al., 2017; Töpf et al., 2005; Basu et al., 2003), SNP genotyping (Juyal et al., 2014; Moorjani et al., 2013), or supertree based approach (Duda and Zrzavý, 2016). Since then, the conflicts between the genomic studies and the archaeological and palaeontological studies exist in the question of the origin of humans (Callaway, 2018). As a result many archaeologists think the ancient DNA as the “devil’s work” (Callaway, 2018). Though the origin of the human in the eastern and southern parts of Africa has long been accepted (Sahle et al., 2018; Behar et al., 2008;

Chan et al., 2015, 2019), a few recent studies documented the presence of humans in the western part of Africa much earlier than the other fossils identified till date (Stringer and Galway-Witham, 2017; Durvasula and Sankararaman, 2020). In this work, we consider the mitochondrial genome (mtDNA) for studying the origin of humans. The mtDNA is haploid, inherited maternally (Hurles and Jobling, 2001), and recombination is very rare event in it (Eyre-Walker and Awadalla, 2001). So the changes of mtDNA sequence occur mainly due to mutations. Our study shows a consistency with the archaeological and palaeontological studies based on the age of origin of human in Africa. Moreover, this study also supports the recently published studies on the origin of human in Africa.

In our present study, we use a novel feature representation of the whole mitochondrial genome (mtDNA) based on a graphical encoding method, named GRAFree (Mahapatra and Mukherjee, 2019). We convert a whole mtDNA sequence into a fixed dimensional feature vector. This feature vector is used for studying the phylogeny of human representatives of different regions of this modern world. It has been hypothesized that hereditary relationship among humans of different regions is reflected by their closeness in genomic signatures, in this case, in mitochondrial genomes (Langille et al., 2010). Discovering this relationship and building a phylogenetic hierarchy among representatives of different parts of this world is the key motivation behind the mathematical representation of a genome. We plot the mtDNAs in a two dimensional coordinate plane by considering successive shifts in  $x$  and  $y$  coordinates using three different encodings of DNA alphabets (see Methods). The 2-D distribution of points are represented by a 5-D vector, formed by the mean, eigen values, and the direction of the eigen vector corresponding to the major eigen value. We adopt a distance function to compute the pair-wise distances using the feature vectors. This comparative study finally gives us a distance matrix. We apply a hierarchical clustering method, UPGMA (Sneath and Sokal, 1973), to derive the phylogenetic tree. We consider three different encodings of shifts of coordinates corresponding to the nucleotides in the genomic sequence, and generate three phylogenetic trees independently. Finally, we combine the trees using a quartet based supertree construction method, ASTRAL (v4.10) (Sayyari and Mirarab, 2016). We believe that, this is the first study of human origin based on the graphical representation of genome.

We apply this method on a large set of mitochondrial DNA sequences of humans. In this study, we consider 369 mitochondrial genomes from more than 120 countries covering six continents (except Antarctica). The data are sequenced and published by various researchers (Friedlaender et al., 2005; Ingman et al., 2000; Roostalu et al., 2006; Hill et al., 2006; Achilli et al., 2005; Olivieri et al., 2006;

81 Maca-Meyer et al., 2001; Starikovskaya et al., 2005; Behar et al., 2006; Ingman and Gyllensten, 2003,  
 82 2007). They are accumulated and stored in a database server named *mtDB* (Ingman and Gyllensten,  
 83 2006). Apart from that we include six outgroup species in our study (see **Supplementary S1**).  
 84 We found that GRAFree distinguishes the outgroups from the humans with very high bootstrap  
 85 supports. The output shows that the time of appearance of human in Africa is consistent with the  
 86 archaeological and palaeontological studies. We found that a significantly large population from  
 87 the western and central parts of Africa are placed at a distinct clade as compared to the rest of the  
 88 humans with a very high bootstrap support indicating a divergence of the genomic signatures of the  
 89 western and central African population from the rest of the humans. This phenomena also indicates  
 90 an early origin of human from these parts of Africa to the world. This period is roughly estimated to  
 91 be 600-700 kilo years ago (kya). This may be earlier than the period presently being considered as  
 92 the period of traceable human origin to these regions, which is between 230-300 kya (Andrews and  
 93 Johnson, 2019; Smith and Ahern, 2013). This study also indicates presence of lineages of migrated  
 94 humans to this part of world which took place much ahead of 65 kya, what is considered to be the  
 95 present time line for the out of Africa hypothesis (Veeramah and Hammer, 2014). Our finding is  
 96 consistent with archaeological findings and discoveries of ancient human skeletons, which predate  
 97 the estimated periods from analysis of different mtDNA and Y-Chromosomal haplogroups of human  
 98 population. It provides a new insight to the “out of Africa” hypothesis. In addition, this study also  
 99 indicates the ancestor of the African populations of western and the central parts appeared much  
 100 earlier than the period being documented as the origin of Neanderthals and Denisovans (Veeramah  
 101 and Hammer, 2014; Green et al., 2010; Mendez et al., 2012).

## 102 2 Materials and methods

103 We consider three sets of structural groups of nucleotides (purine, pyrimidine), (amino, keto), and  
 104 (weak H-bond, strong H-bond) separately for representing DNA by a sequence of points in a 2-  
 105 D integral coordinate space. This point set is called **Graphical Foot Print (GFP)** of a DNA  
 106 sequence. We adopt a technique for extracting features from GFPs and use them for constructing  
 107 phylogenetic trees (Mahapatra and Mukherjee, 2019). As there are three different types of numerical  
 108 representation of nucleotides, we could form three different hypotheses for the phylogeny. Finally,  
 109 we combine the trees generated from these three hypotheses by applying a tree merging algorithm

called ASTRAL (Mirarab et al., 2014; Sayyari and Mirarab, 2016).

## 2.1 Feature space

**Definition 1 Graphical Foot Print (GFP).** Let  $S$  be a DNA sequence, such that,  $S \in \Sigma^+$ ,  $\Sigma = \{A, T, G, C\}$ . For each combination of Purine (R)/Pyrimidine (Y), Amino (M)/Keto (K), and Strong H-bond (S)/Weak H-bond (W), the GFP of  $S$ ,  $\phi(S)$ , is the locus of 2-D points in an integral coordinate space, such that  $(x_i, y_i)$  is the coordinate of the alphabet  $s_i$ ,  $\forall s_i \in S$ , for  $i = 1, 2, \dots, n$ , and  $x_0 = y_0 = 0$ .

Case-1: for Purine/Pyrimidine

$$\begin{aligned} x_i &= x_{i-1} + 1; & \text{if } s_i = G \\ &= x_{i-1} - 1; & \text{if } s_i = A \\ &= x_{i-1}; & \text{otherwise} \\ y_i &= y_{i-1} + 1; & \text{if } s_i = C \\ &= y_{i-1} - 1; & \text{if } s_i = T \\ &= y_{i-1}; & \text{otherwise} \end{aligned} \tag{1}$$

Case-2: for Strong H-bond/Weak H-bond

$$\begin{aligned} x_i &= x_{i-1} + 1; & \text{if } s_i = C \\ &= x_{i-1} - 1; & \text{if } s_i = G \\ &= x_{i-1}; & \text{otherwise} \\ y_i &= y_{i-1} + 1; & \text{if } s_i = T \\ &= y_{i-1} - 1; & \text{if } s_i = A \\ &= y_{i-1}; & \text{otherwise} \end{aligned} \tag{2}$$

119 *Case-3: for Amino/Keto*

$$\begin{aligned}
 x_i &= x_{i-1} + 1; & \text{if } s_i = A \\
 &= x_{i-1} - 1; & \text{if } s_i = C \\
 &= x_{i-1}; & \text{otherwise} \\
 y_i &= y_{i-1} + 1; & \text{if } s_i = T \\
 &= y_{i-1} - 1; & \text{if } s_i = G \\
 &= y_{i-1}; & \text{otherwise}
 \end{aligned} \tag{3}$$

120 We denote GFPs of Case-1, Case-2, and Case-3, as GFP-RY ( $\Phi_{RY}$ ), GFP-SW ( $\Phi_{SW}$ ), and GFP-MK  
 121 ( $\Phi_{MK}$ ), respectively.

122 **Definition 2 Drift of GFP.** Let  $\mathcal{S}$  be a DNA sequence and  $s_i$  be the alphabet ( $s_i \in \{A, T, G, C\}$ )  
 123 at the  $i^{th}$  position of  $\mathcal{S}$ . Let  $\phi_i(\mathcal{S})$  denote the corresponding  $(x_i, y_i)$  the coordinate of  $s_i$  in  $\Phi(\mathcal{S})$ .

124 Then for length  $L$ , drift at the  $i^{th}$  position is defined as,

125  $\delta_i^{(L)} = \phi_{i+L}(\mathcal{S}) - \phi_i(\mathcal{S})$ , where  $(i + L) \leq |\mathcal{S}|$

126 Considering the drifts for every  $i^{th}$  location of the whole sequence, the sequence of drifts is  
 127 denoted by

128  $\Delta^{(L)} = [\delta_0^{(L)}, \delta_1^{(L)}, \delta_2^{(L)}, \delta_3^{(L)}, \dots, \delta_m^{(L)}]$ , where  $(m + L) = |\mathcal{S}|$

129 For GFP-RY (refer to Definition 1), an element  $(x_i, y_i)$  in  $\Delta_{RY}^{(L)}$  provides excess numbers of  $G$   
 130 from  $A$  and  $C$  from  $T$  in segment of length  $L$  starting from the  $i^{th}$  location, respectively. Similarly,  
 131 in GFP-SW, they are the excess numbers of  $C$  from  $G$  and  $T$  from  $A$  (represents as  $\Delta_{SW}^{(L)}$ ), and in  
 132 GFP-MK, they correspond to the excess numbers of  $A$  from  $C$  and  $T$  from  $G$  (represents as  $\Delta_{MK}^{(L)}$ ),  
 133 respectively.

134 We also call the elements of  $\Delta^{(L)}$  as points, as they can be plotted on a 2-D coordinate system.  
 135 We call this plot as the scatter plot of the drift sequence. Similarly, we get a scatter plot of a GFP.  
 136 It has been observed that in many cases the scatter plots of  $\Delta$  have similar structure for closely  
 137 spaced species mentioned in literature. It can also be observed that differences between two GFPs  
 138 get reflected in their respective drifts.

139 We represent spatial distribution of these points of  $\Delta$  by an elliptical model using a five dimen-  
 140 sional feature descriptor:  $(\mu_x, \mu_y, \Lambda, \lambda, \theta)$ , where  $(\mu_x, \mu_y)$  is the center of the coordinates,  $\Lambda$  and  $\lambda$

are major and minor eigen values of the covariance matrix, and  $\theta$  is the angle formed by the eigen vector corresponding to  $\Lambda$  with respect to the  $x$ -axis. We make  $\mathcal{F}$  number of non overlapping equal length fragments from  $\Delta$  and represent each fragment using the five dimensional feature descriptor.

## 2.2 Distance function

For two sequences  $\mathcal{P}$  and  $\mathcal{Q}$  with the feature descriptors of  $i^{th}$  fragments  $(\mu_{x\mathcal{P}_i}, \mu_{y\mathcal{P}_i}, \Lambda_{\mathcal{P}_i}, \lambda_{\mathcal{P}_i}, \theta_{\mathcal{P}_i})$  and  $(\mu_{x\mathcal{Q}_i}, \mu_{y\mathcal{Q}_i}, \Lambda_{\mathcal{Q}_i}, \lambda_{\mathcal{Q}_i}, \theta_{\mathcal{Q}_i})$ , where  $i \leq \mathcal{F}$ , we use the following distance function between them,

$$D(\mathcal{P}, \mathcal{Q}) = \frac{1}{\mathcal{F}} \sum_{i=1}^{\mathcal{F}} \left[ \sqrt{\mu_{\mathcal{P}_i}^T \mu_{\mathcal{P}_i} + \mu_{\mathcal{Q}_i}^T \mu_{\mathcal{Q}_i} - 2\mu_{\mathcal{P}_i}^T \mu_{\mathcal{Q}_i} \cos(\theta_{\mathcal{P}_i} - \theta_{\mathcal{Q}_i})} + \sqrt{(\Lambda_{\mathcal{P}_i} - \Lambda_{\mathcal{Q}_i})^2 + (\lambda_{\mathcal{P}_i} - \lambda_{\mathcal{Q}_i})^2} \right]$$

where,  $\mu_{\mathcal{P}_i} = [\mu_{x\mathcal{P}_i}, \mu_{y\mathcal{P}_i}]$  and  $\mu_{\mathcal{Q}_i} = [\mu_{x\mathcal{Q}_i}, \mu_{y\mathcal{Q}_i}]$  (4)

It can be shown that the above distance function is a metric.

## 3 Results

### 3.1 Computation of GFP and Drift sequence

In this study, we consider three sets of structural groups of nucleotides (purine, pyrimidine), (amino, keto), and (weak H-bond, strong H-bond) separately for representing DNA by a sequence of points in a 2D integral coordinate space. We derive the GFP using these three encodings. We consider them as  $GFP_{RY}$ ,  $GFP_{SW}$ , and  $GFP_{MK}$ , respectively. The drift sequence of a GFP is the coordinate difference between those pair of points which are spanned by  $L$  number of points in between. Our proposed method, GRAFree, depends on two parameters such as the size of the window ( $L$ ) and number of fragments of the sequence of drifts ( $\mathcal{F}$ ). Each fragment is represented by a 5D vector as mentioned above and concatenation of  $\mathcal{F}$  vectors provide a feature vector of dimension  $5\mathcal{F}$ .

Now, what is the optimal value of  $L$  and  $\mathcal{F}$  which we should consider for the input dataset. For this, we compute the Shannon entropy (Shannon, 2001) of the drift sequence of each GFP for different values of  $L$  (starting from 50 to 2000 with the difference of 50). It is observed in Fig. 1 that for all of the GFPs initially by increasing the value of  $L$ , the entropy increases till a certain

limit. This incident represents that by increasing the value of  $L$ , the number of distinct points of the sequence of the drifts also increases. After a certain value of  $L$ , e.g, at  $L = 550$ , the entropy of all mtDNA becomes stabilized (changes  $< 1\%$ ). By increasing the value of  $L$  after that does not change the entropy significantly. It is observed that for  $L \geq 550$ , the  $\Delta^{(L)}$  contains significantly large number of distinct point coordinates than that of  $L < 550$ . Hence, we choose the value of  $L$  as 550.

For getting more precise signature of a drift sequence, we make 15 non-overlapping partitions of the drift sequence. Hence, in this study, we consider  $\mathcal{F}$  as 15. Each fragment is represented by the 5D feature vector which consists of the mean of the point coordinates of the corresponding fragment, eigen (both major and minor) values, and the angle formed by the eigen vector corresponding to the major eigen value with respect to the  $x$ -axis. Hence, a complete drift is represented by 75 dimensional feature vector.

We compute the Graphical Foot Print (GFP or  $\phi$ ) of each mtDNA of human taken from different parts of the world. For  $L = 550$ , we also compute the sequence of the drifts of the corresponding GFP. It is observed that the species which are closely related, have similar patterns in both of their GFP and drift sequence. Typical examples of drift sequences of humans from different regions of the world and the outgroup species, such as baboon, gorilla, and chimpanzee are shown in Fig. 2.

## 3.2 Deriving trees

We propose a novel distance function to compute the pair-wise distances. Our proposed distance function is a metric. We apply a hierarchical clustering method, Unweighted Pair Group Method with Arithmetic mean (UPGMA) (Sneath and Sokal, 1973), to form the phylogenetic tree from the distance matrix.

We apply this same technique on three different cases such as  $GFP_{RY}$ ,  $GFP_{SW}$ , and  $GFP_{MK}$ , separately. Thus we derive three different phylogenetic trees by following three different hypotheses. These trees are provided in the **Supplementary S2 Fig. 1-3 in Section 1**. There are various methods to combine multiple trees and to form a supertree. We apply a quartet based method, ASTRAL (Sayyari and Mirarab, 2016), to combine three trees. Please refer to Fig. 3 and also refer to the **Supplementary S2 Fig. 4 in Section 1**.

### 188 3.3 Bootstrapping

189 The primary motivation of bootstrapping is to generate the population from a single genome. It  
 190 is observed that the average intraspecies variation in mitochondrial genome of *Homo sapiens* is  
 191 within 1.2% (Castro et al., 1998). But in this study, we are trying to derive the relationships  
 192 between different communities of human. Hence, we consider the average genetic variation of  
 193 mtDNA for a particular community as 0.3% (Jarczak et al., 2019). Here we propose a bootstrapping  
 194 technique which considers the genetic variance of a sample space within 0.3%. For that we apply  
 195 insertion, deletion, and mutation at each location with an equal probability of 0.1% and consider  
 196 an unbiased selection of the nucleotides at each location for the insertion and the mutation. We  
 197 generate 100 replicas using this proposed bootstrapping method and construct trees from each set of  
 198 sequences using GRAFree method by setting values of  $L$  and  $\mathcal{F}$  as discussed in the previous section.  
 199 Felsenstein’s bootstrapping method (Felsenstein, 1985) assesses the robustness of phylogenetic trees  
 200 using the presence and absence of clades. For the large scale genomics Felsenstein’s bootstrap is  
 201 not efficient to sum up the replicas. For the hundred of species this method is inclined to produce  
 202 low bootstrap support (Lemoine et al., 2018). So here we apply a modification of Felsenstein’s  
 203 bootstrapping, where the presence of a clade is quantified using the transfer distance proposed  
 204 in (Lemoine et al., 2018). The transfer distance (Charon et al., 2006) is the minimum number of  
 205 changes required to transform one partition to another. We compute the occurrence of each clade  
 206 using the tool BOOSTER (Lemoine et al., 2018). The clades having a high bootstrap support  
 207 ( $\geq 75\%$ ) are denoted as the black dot on the edge in Fig. 3 and also refer to the **Supplementary**  
 208 **S2 Fig. 1-4 in Section 1.**

### 209 3.4 Robustness against variation of hyper parameters

210 Here we test the consistency of the results for different values of  $L$  and  $\mathcal{F}$ . For that we generate  
 211 a large number of trees by considering the values of  $L$  from 500 to 1000 and  $\mathcal{F}$  from 5 to 50. We  
 212 consider the tree derived for  $L = 550$  and  $\mathcal{F} = 15$  as the reference tree. It is observed that most of  
 213 the clades of the reference tree is consistent (occurrences more than 80%) for different parameter  
 214 values (Fig. 3) and also refer to the **Supplementary S2 Fig. 1-4 in Section 1.**

### 215 3.5 Estimation of time of origin of clades

216 We applied UPGMA technique to get the edge lengths of the derived trees. Most of the studies pro-  
 217 posed that the speciation of chimpanzee and human occurred 7-8 million years ago (mya) (Langer-  
 218 graber et al., 2012; Patterson et al., 2006; Reich, 2018). To calibrate the distances of the derived  
 219 trees we consider the speciation age of chimpanzee and human and derived the age of the origin  
 220 of different groups of humans. We have used this calibration to estimate time of origins of clades  
 221 which have strong bootstrap supports. It is observed that the most recent common ancestor of all  
 222 the humans originated about 850 kya, while the African clade originated 650 kya. The derived trees  
 223 also indicate that the “Out-of-Africa” migration appeared about 550 kya (Fig. 3). The trees with  
 224 the edge lengths are provided in the **Supplementary S3**.

## 225 4 Discussion

226 We develop a new approach, GRAFree, to derive the phylogenetic relationships among a large  
 227 number of mitochondrial genome of AMH of different regions of this world. We also include six  
 228 outgroup species (such as other than human) in our study. The proposed approach is quite different  
 229 from mitochondrial haplogroup based approaches. This method is effective in capturing broad  
 230 distinct clades. This is evident from successful separation of the outgroup species from human in  
 231 our study. However, this method identifies close relationship between chimpanzee and gorilla than  
 232 human. It is also observed that the proposed distance function is more robust than the Euclidean  
 233 distance function for the selected feature vector.

234 It is a well accepted hypothesis that the ancient human originated in Africa. The southern  
 235 and eastern Africa is long been considered as the region where the human first originated (Behar  
 236 et al., 2008; Chan et al., 2015, 2019). In recent years, the researchers found early *H. sapiens*  
 237 fossils from Morocco which dates far earlier than the other fossils identified till date (Richter et al.,  
 238 2017; Hublin et al., 2017). These findings raised the debate of the origin of human. Through the  
 239 genetic study in very recent years, the researchers identified a common ancestor of the populations  
 240 of the western parts of Africa (Durvasula and Sankararaman, 2020). This ancestor is mentioned  
 241 as the “ghost archaic human” or “African Neanderthals” (Stringer and Galway-Witham, 2017;  
 242 Durvasula and Sankararaman, 2020) and carries a significant distinct feature than the Neanderthals  
 243 and Denisovans. It is also documented that 2 – 19% of the west African DNA are inherited from the

244 ancestor, “African Neanderthals” (Durvasula and Sankararaman, 2020). There are some studies  
245 which analyzed the genome-wide data and the artefacts, reported that the ancient humans were  
246 more widespread across the globe (Callaway, 2018). Some impressions of the presence of ancient  
247 humans earlier than the fossils record added that the ancient human were more widespread than we  
248 think (Warren, 2019; Callaway, 2018). In the derived tree, the similar phenomena is also observed,  
249 a major clade is formed from the populations of western and central parts of Africa. This clade  
250 is placed at the most basal position of the phylogenetic tree with a very high bootstrap support  
251 score (see Fig. 3). We estimated the time of origin of the ancestor of the clade as almost 600-700  
252 kya which originated earlier than the other ancient humans, such as Neanderthals and Denisovans,  
253 which is further concordance to the opinion of some recent studies (Steinrücken et al., 2018; Schaefer  
254 et al., 2016). So this phenomena supports the early occurrence of our species, and this study also  
255 supports that the western and central parts of Africa experienced the earliest occurrence of human.

256 All the derived trees show a very mixed representation of the humans from different communities.  
257 Researchers found some signatures of the admixture with modern humans in as recent as 15-30  
258 kya, such that almost 3 – 5% of the Asian DNA are inherited from Denisovans (Gibbons, 2019)  
259 and almost 1.5 – 2.1% of the non-African genome are inherited from Neandarthals (Schaefer et al.,  
260 2016). Though the bootstrap supports of all of these occurrences are lower than the accepted  
261 significant level, but appearance of the same event in a repetitive manner shows a high possibility  
262 of the admixture in modern humans.

263 There are still some small groups placed together in all the derived trees. It is also observed that  
264 the Asian populations are closely related to the African population. There are some archaeological  
265 studies that report the similarities in the ancient instruments in African and Asian population (Mel-  
266 lars, 2006). Various studies proposed the close relation between north African and Levantine based  
267 on the haplogroups of both mtDNA and Y-chromosomes (Olivieri et al., 2006; van de Loosdrecht  
268 et al., 2018; Elkamel et al., 2018). It is also noticed that the eastern and the north-eastern Africans  
269 are closely placed with both the Asian and the European populations. All the derived trees also  
270 show the close relationships among the Pacific islanders (Oceania), such as Micronesia, Melanesia,  
271 and Polynesia. It is also observed that DNA of these populations are also close to the DNA of the  
272 Taiwanese. This phenomena also supports the existing studies where the close link between the  
273 Pacific islanders and the Taiwanese is described (Trejaut, 2005; Friedlaender et al., 2008). Though  
274 the bootstrap score is less than that of the accepted level, but its repeated occurrence in the derived

275 trees implies the higher chance of these relationships being true in the phylogenetic study.

276 All the observations of this study have been summarized in Table 1.

## 277 5 Conclusion

278 In this study we reported a study of human origin based on the graphical representation where  
 279 we inspect the origin and the migration of human based on a novel feature vector. The proposed  
 280 method may be extended to study evolution of other types of genomic sequences. This method  
 281 captures some unique signature of the whole mtDNA. It is observed that this method efficiently  
 282 captures the broad relationships rather than the precise relationships near the leaf nodes. In this  
 283 study, we present such broad divergence among the human population. Our result supports some  
 284 existing hypotheses like the Africa witnessed the first human in the world and the close relationship  
 285 among the Eurasian and the African population. The origin of the African clade in our study is  
 286 also close to the group of archaeological reports. Apart from that, this study provides an evidence  
 287 of the presence of the “ghost ancestor” of the population of the west and central Africa earlier than  
 288 that of the fossils identified. This phenomena also demonstrates that the west and central Africa  
 289 are very important for the early evolution of human.

## 290 Code availability

291 We implemented a Python based pipeline available at [http://www.facweb.iitkgp.ac.in/~jay/](http://www.facweb.iitkgp.ac.in/~jay/GraFree/HIIARG-GRAFree.html)  
 292 [GraFree/HIIARG-GRAFree.html](http://www.facweb.iitkgp.ac.in/~jay/GraFree/HIIARG-GRAFree.html). The mirror copy of this program is also available at [https://](https://github.com/aritramhp/GRAFree.git)  
 293 [github.com/aritramhp/GRAFree.git](https://github.com/aritramhp/GRAFree.git). This program (i) computes the tree based on the GRAFree  
 294 algorithm, (ii) generates multiple number of bootstrap sequences of a target sequence, and (iii)  
 295 derives the bootstrap trees from the bootstrap sequences.

## 296 Data availability

297 All the data are publicly available in the online database, NCBI, with their accession number.  
 298 The list of accession numbers we consider in this study are provided in **Supplementary S1**. The  
 299 human mitochondrial sequences are further annotated and stored in public database server, mtDB.

## 300 Ethics declarations

## 301 Conflict of interest

302 On behalf of all authors, the corresponding author states that there is no conflict of interest.

## 303 Ethical Approval

304 The ethical approval from the institute is not applicable for this study.

## 305 Funding

306 This research did not receive any specific grant from funding agencies in the public, commercial or  
307 not-for-profit sectors.

## 308 Informed Consent

309 All the data and personal information are collected from a public database. These data have been  
310 generated by various researchers since a decade.

## 311 References

- 312 Achilli, A., Rengo, C., Battaglia, V., Pala, M., Olivieri, A., Fornarino, S., Magri, C., Scozzari, R.,  
313 Babudri, N., Santachiara-Benerecetti, A. S., Bandelt, H.-J., Semino, O., and Torroni, A. (2005).  
314 Saami and Berbers-An Unexpected Mitochondrial DNA Link. *The American Journal of Human*  
315 *Genetics*, 76(5):883–886.
- 316 Andrews, P. and Johnson, R. J. (2019). Evolutionary basis for the human diet: consequences for  
317 human health. *Journal of Internal Medicine*.
- 318 Bae, C. J., Douka, K., and Petraglia, M. D. (2017). On the origin of modern humans: Asian  
319 perspectives. *Science*, 358(6368):eaai9067.
- 320 Baker, J. L., Rotimi, C. N., and Shriner, D. (2017). Human ancestry correlates with language and  
321 reveals that race is not an objective genomic classifier. *Scientific Reports*, 7(1):1572.
- 322 Balter, M. (2019). Language May Have Helped Early Humans Spread Out of Africa. *Science*.
- 323 Basu, A., Mukherjee, N., Roy, S., Sengupta, S., Banerjee, S., Chakraborty, M., Dey, B., Roy, M.,  
324 Roy, B., Bhattacharyya, N. P., et al. (2003). Ethnic India: A Genomic View, With Special  
325 Reference to Peopling and Structure. *Genome Research*, 13(10):2277–2290.
- 326 Behar, D. M., Metspalu, E., Kivisild, T., Achilli, A., Hadid, Y., Tzur, S., Pereira, L., Amorim,  
327 A., Quintana-Murci, L., Majamaa, K., Herrnsstadt, C., Howell, N., Balanovsky, O., Kutuev,  
328 I., Pshenichnov, A., Gurwitz, D., Bonne-Tamir, B., Torroni, A., Villems, R., and Skorecki, K.  
329 (2006). The Matrilineal Ancestry of Ashkenazi Jewry: Portrait of a Recent Founder Event. *The*  
330 *American Journal of Human Genetics*, 78(3):487–497.
- 331 Behar, D. M., Villems, R., Soodyall, H., Blue-Smith, J., Pereira, L., Metspalu, E., Scozzari, R.,  
332 Makkan, H., Tzur, S., Comas, D., et al. (2008). The dawn of human matrilineal diversity. *The*  
333 *American Journal of Human Genetics*, 82(5):1130–1140.
- 334 Bhugra, D. and Becker, M. A. (2005). Migration, cultural bereavement and cultural identity. *World*  
335 *Psychiatry*, 4(1):18.

- 336 Browning, S. R., Browning, B. L., Zhou, Y., Tucci, S., and Akey, J. M. (2018). Analysis of Human  
337 Sequence Data Reveals Two Pulses of Archaic Denisovan Admixture. *Cell*, 173(1):53–61.
- 338 Callaway, E. (2018). Divided by DNA: The uneasy relationship between archaeology and ancient  
339 genomics. *Nature*, 555(7698).
- 340 Cann, R. L., Stoneking, M., and Wilson, A. C. (1987). Mitochondrial DNA and human evolution.  
341 *Nature*, 325(6099):31.
- 342 Cartmill, M. and Smith, F. H. (2009). *The Human Lineage*. Wiley-Blackwell.
- 343 Castro, J. A., Picornell, A., and Ramon, M. (1998). Mitochondrial DNA: a tool for populational  
344 genetics studies. *International Microbiology*, 1(4):327–332.
- 345 Chan, E. K., Hardie, R.-A., Petersen, D. C., Beeson, K., Bornman, R. M., Smith, A. B., and Hayes,  
346 V. M. (2015). Revised Timeline and Distribution of the Earliest Diverged Human Maternal  
347 Lineages in Southern Africa. *PLoS One*, 10(3).
- 348 Chan, E. K., Timmermann, A., Baldi, B. F., Moore, A. E., Lyons, R. J., Lee, S.-S., Kalsbeek,  
349 A. M., Petersen, D. C., Rautenbach, H., Förtsch, H. E., et al. (2019). Human origins in a  
350 southern African palaeo-wetland and first migrations. *Nature*, 575(7781):185–189.
- 351 Charon, I., Denoeud, L., Guénoche, A., and Hudry, O. (2006). Maximum transfer distance between  
352 partitions. *Journal of Classification*, 23(1):103–121.
- 353 Duda, P. and Zrzavý, J. (2016). Human population history revealed by a supertree approach.  
354 *Scientific Reports*, 6:29890.
- 355 Durvasula, A. and Sankararaman, S. (2020). Recovering signals of ghost archaic introgression in  
356 african populations. *Science Advances*, 6(7).
- 357 Elkamel, S., Boussetta, S., Khodjet-El-Khil, H., Benammar Elgaaied, A., and Cherni, L. (2018).  
358 Ancient and recent Middle Eastern maternal genetic contribution to North Africa as viewed  
359 by mtDNA diversity in Tunisian Arab populations. *American Journal of Human Biology*,  
360 30(3):e23100.
- 361 Eyre-Walker, A. and Awadalla, P. (2001). Does human mtdna recombine? *Journal of Molecular*  
362 *Evolution*, 53(4):430–435.
- 363 Felsenstein, J. (1985). Confidence Limits on Phylogenies: An Approach Using the Bootstrap.  
364 *Evolution*, 39(4):783–791.
- 365 Friedlaender, J., Schurr, T., Gentz, F., Koki, G., Friedlaender, F., Horvat, G., Babb, P., Cerchio, S.,  
366 Kaestle, F., Schanfield, M., Deka, R., Yanagihara, R., and Merriwether, D. A. (2005). Expand-  
367 ing Southwest Pacific Mitochondrial Haplogroups P and Q. *Molecular Biology and Evolution*,  
368 22(6):1506–1517.
- 369 Friedlaender, J. S., Friedlaender, F. R., Reed, F. A., Kidd, K. K., Kidd, J. R., Chambers, G. K.,  
370 Lea, R. A., Loo, J.-H., Koki, G., Hodgson, J. A., Merriwether, D. A., and Weber, J. L. (2008).  
371 The genetic structure of pacific islanders. *PLOS Genetics*, 4(1):1–18.
- 372 Gibbons, A. (2019). Our mysterious cousins the Denisovans may have mated with modern humans  
373 as recently as 15,000 years ago. *Science*.
- 374 Green, R. E., Krause, J., Briggs, A. W., Maricic, T., Stenzel, U., Kircher, M., Patterson, N., Li, H.,  
375 Zhai, W., Fritz, M. H.-Y., et al. (2010). A Draft Sequence of the Neandertal Genome. *Science*,  
376 328(5979):710–722.

- 377 Hill, C., Soares, P., Mormina, M., Macaulay, V., Meehan, W., Blackburn, J., Clarke, D., Raja,  
378 J. M., Ismail, P., Bulbeck, D., Oppenheimer, S., and Richards, M. (2006). Phylogeography and  
379 Ethnogenesis of Aboriginal Southeast Asians. *Molecular Biology and Evolution*, 23(12):2480–  
380 2491.
- 381 Hublin, J.-J., Ben-Ncer, A., Bailey, S. E., Freidline, S. E., Neubauer, S., Skinner, M. M., Bergmann,  
382 I., Le Cabec, A., Benazzi, S., Harvati, K., and Gunz, P. (2017). New fossils from Jebel Irhoud,  
383 Morocco and the pan-African origin of *Homo sapiens*. *Nature*, 546(7657):289–292.
- 384 Hurles, M. E. and Jobling, M. A. (2001). Haploid chromosomes in molecular ecology: lessons from  
385 the human Y. *Molecular Ecology*, 10(7):1599–1613.
- 386 Ingman, M. and Gyllensten, U. (2003). Mitochondrial Genome Variation and Evolutionary History  
387 of Australian and New Guinean Aborigines. *Genome Research*, 13(7):1600–1606.
- 388 Ingman, M. and Gyllensten, U. (2006). mtDB: Human Mitochondrial Genome Database, a resource  
389 for population genetics and medical sciences. *Nucleic Acids Research*, 34(suppl\_1):D749–D751.
- 390 Ingman, M. and Gyllensten, U. (2007). A recent genetic link between Sami and the Volga-Ural  
391 region of Russia. *European Journal of Human Genetics*, 15(1):115.
- 392 Ingman, M., Kaessmann, H., Pääbo, S., and Gyllensten, U. (2000). Mitochondrial genome variation  
393 and the origin of modern humans. *Nature*, 408(6813):708.
- 394 Jarczak, J., Grochowalski, L., Marciniak, B., Lach, J., Słomka, M., Sobalska-Kwapis, M.,  
395 Lorkiewicz, W., Pułaski, L., and Strapagiel, D. (2019). Mitochondrial DNA variability of the  
396 Polish population. *European Journal of Human Genetics*, page 1.
- 397 Jinam, T. A., Phipps, M. E., Aghakhanian, F., Majumder, P. P., Datar, F., Stoneking, M., Sawai,  
398 H., Nishida, N., Tokunaga, K., Kawamura, S., et al. (2017). Discerning the Origins of the  
399 Negritos, First Sundaland People: Deep Divergence and Archaic Admixture. *Genome Biology  
400 and Evolution*, 9(8):2013–2022.
- 401 Juyal, G., Mondal, M., Luisi, P., Laayouni, H., Sood, A., Midha, V., Heutink, P., Bertranpetit, J.,  
402 Thelma, B., and Casals, F. (2014). Population and genomic lessons from genetic analysis of two  
403 Indian populations. *Human Genetics*, 133(10):1273–1287.
- 404 Langergraber, K. E., Prüfer, K., Rowney, C., Boesch, C., Crockford, C., Fawcett, K., Inoue, E.,  
405 Inoue-Muruyama, M., Mitani, J. C., Muller, M. N., Robbins, M. M., Schubert, G., Stoinski,  
406 T. S., Viola, B., Watts, D., Wittig, R. M., Wrangham, R. W., Zuberbühler, K., Pääbo, S., and  
407 Vigilant, L. (2012). Generation times in wild chimpanzees and gorillas suggest earlier divergence  
408 times in great ape and human evolution. *Proceedings of the National Academy of Sciences*,  
409 109(39):15716–15721.
- 410 Langille, M. G. I., Hsiao, W. W. L., and Brinkman, F. S. L. (2010). Detecting genomic islands  
411 using bioinformatics approaches. *Nature Reviews Microbiology*, 8(5):373–382.
- 412 Lemoine, F., Entfellner, J.-B. D., Wilkinson, E., Correia, D., Felipe, M. D., Oliveira, T., and  
413 Gascuel, O. (2018). Renewing Felsensteins phylogenetic bootstrap in the era of big data. *Nature*,  
414 page 1.
- 415 Liu, H., Prugnolle, F., Manica, A., and Balloux, F. (2006). A Geographically Explicit Genetic  
416 Model of Worldwide Human-Settlement History. *The American Journal of Human Genetics*,  
417 79(2):230–237.

- 418 Maca-Meyer, N., González, A. M., Larruga, J. M., Flores, C., and Cabrera, V. M. (2001). Major  
419 genomic mitochondrial lineages delineate early human expansions. *BMC Genetics*, 2(1):13.
- 420 Mafessoni, F. (2019). Encounters with archaic hominins. *Nature Ecology & Evolution*, 3(1):14–15.
- 421 Mahapatra, A. and Mukherjee, J. (2019). GRaphical footprint based Alignment-Free method  
422 (GRAFree) for classifying the species in Large-Scale Genomics. In *International Conference*  
423 *on Pattern Recognition and Machine Intelligence*, pages 105–112. Springer.
- 424 Mellars, P. (2006). Going East: New Genetic and Archaeological Perspectives on the Modern  
425 Human Colonization of Eurasia. *Science*, 313(5788):796–800.
- 426 Mendez, F. L., Watkins, J. C., and Hammer, M. F. (2012). Global genetic variation at OAS1 pro-  
427 vides evidence of archaic admixture in Melanesian populations. *Molecular Biology and Evolution*,  
428 29(6):1513–1520.
- 429 Mesoudi, A. (2018). Migration, acculturation, and the maintenance of between-group cultural  
430 variation. *PLOS ONE*, 13(10):e0205573.
- 431 Mirarab, S., Reaz, R., Bayzid, M. S., Zimmermann, T., Swenson, M. S., and Warnow, T. (2014).  
432 ASTRAL: genome-scale coalescent-based species tree estimation. *Bioinformatics*, 30:i541–i548.
- 433 Mondal, M., Bertranpetit, J., and Lao, O. (2019). Approximate Bayesian computation with deep  
434 learning supports a third archaic introgression in Asia and Oceania. *Nature Communications*,  
435 10(1):246.
- 436 Mondal, M., Casals, F., Xu, T., Dall’Olio, G. M., Pybus, M., Netea, M. G., Comas, D., Laayouni,  
437 H., Li, Q., Majumder, P. P., et al. (2016). Genomic analysis of Andamanese provides insights  
438 into ancient human migration into Asia and adaptation. *Nature Genetics*, 48(9):1066.
- 439 Moorjani, P., Thangaraj, K., Patterson, N., Lipson, M., Loh, P.-R., Govindaraj, P., Berger, B.,  
440 Reich, D., and Singh, L. (2013). Genetic Evidence for Recent Population Mixture in India. *The*  
441 *American Journal of Human Genetics*, 93(3):422–438.
- 442 Olivieri, A., Achilli, A., Pala, M., Battaglia, V., Fornarino, S., Al-Zahery, N., Scozzari, R., Cruciani,  
443 F., Behar, D. M., Dugoujon, J.-M., Coudray, C., Santachiara-Benerecetti, A. S., Semino, O.,  
444 Bandelt, H.-J., and Torroni, A. (2006). The mtDNA Legacy of the Levantine Early Upper  
445 Palaeolithic in Africa. *Science*, 314(5806):1767–1770.
- 446 Patterson, N., Richter, D. J., Gnerre, S., Lander, E. S., and Reich, D. (2006). Genetic evidence for  
447 complex speciation of humans and chimpanzees. *Nature*, 441(7097):1103.
- 448 Prüfer, K., Racimo, F., Patterson, N., Jay, F., Sankararaman, S., Sawyer, S., Heinze, A., Renaud,  
449 G., Sudmant, P. H., De Filippo, C., Li, H., Mallick, S., Dannemann, M., Fu, Q., Kircher, M.,  
450 Kuhlmann, M., Lachmann, M., Meyer, M., Ongyerth, M., Siebauer, M., Theunert, C., Tandon,  
451 A., Moorjani, P., Pickrell, J., Mullikin, J. C., Vohr, S. H., Green, R. E., Hellmann, I., Johnson,  
452 P. L. F., Blanche, H., Cann, H., Kitzman, J. O., Shendure, J., Eichler, E. E., Lein, E. S., Bakken,  
453 T. E., Golovanova, L. V., Doronichev, V. B., Shunkov, M. V., Derevianko, A. P., Viola, B.,  
454 Slatkin, M., Reich, D., Kelso, J., and Pääbo, S. (2014). The complete genome sequence of a  
455 Neanderthal from the Altai Mountains. *Nature*, 505(7481):43.
- 456 Reich, D. (2018). *Who we are and how we got here: Ancient DNA and the new science of the*  
457 *human past*. Oxford University Press.

- 458 Richter, D., Grün, R., Joannes-Boyau, R., Steele, T. E., Amani, F., Rué, M., Fernandes, P., Raynal,  
459 J.-P., Geraads, D., Ben-Ncer, A., Hublin, J.-J., and McPherron, S. P. (2017). The age of the  
460 hominin fossils from Jebel Irhoud, Morocco, and the origins of the Middle Stone Age. *Nature*,  
461 546(7657):293–296.
- 462 Roostalu, U., Kutuev, I., Loogväli, E., Metspalu, E., Tambets, K., Reidla, M., Khusnutdinova,  
463 E., Usanga, E., Kivisild, T., and Villems, R. (2006). Origin and Expansion of Haplogroup H,  
464 the Dominant Human Mitochondrial DNA Lineage in West Eurasia: The Near Eastern and  
465 Caucasian Perspective. *Molecular Biology and Evolution*, 24(2):436–448.
- 466 Sahle, Y., Reyes-Centeno, H., and Bentz, C. (2018). Modern human origins and dispersal: current  
467 state of knowledge and future directions. *Evolutionary Anthropology: Issues, News, and Reviews*,  
468 27(2):64–67.
- 469 Sayyari, E. and Mirarab, S. (2016). Fast Coalescent-Based Computation of Local Branch Support  
470 from Quartet Frequencies. *Molecular Biology and Evolution*, 33(7):1654–1668.
- 471 Schaefer, N. K., Shapiro, B., and Green, R. E. (2016). Detecting hybridization using ancient DNA.  
472 *Molecular Ecology*, 25(11):2398–2412.
- 473 Shannon, C. E. (2001). A mathematical theory of communication. *ACM SIGMOBILE Mobile*  
474 *Computing and Communications Review*, 5(1):3–55.
- 475 Shriner, D., Tekola-Ayele, F., Adeyemo, A., and Rotimi, C. N. (2016). Ancient Human Migration  
476 after Out-of-Africa. *Scientific Reports*, 6(26565).
- 477 Smith, F. H. and Ahern, J. C. (2013). *The origins of modern humans: biology reconsidered*. John  
478 Wiley & Sons.
- 479 Sneath, P. H. A. and Sokal, R. R. (1973). *Numerical Taxonomy*. W. H. Freeman and Company,  
480 San Francisco.
- 481 Starikovskaya, E. B., Sukernik, R. I., Derbeneva, O. A., Volodko, N. V., Ruiz-Pesini, E., Torroni,  
482 A., Brown, M. D., Lott, M. T., Hosseini, S. H., Huoponen, K., and Wallace, D. C. (2005).  
483 Mitochondrial DNA Diversity in Indigenous Populations of the Southern Extent of Siberia, and  
484 the Origins of Native American Haplogroups. *Annals of Human Genetics*, 69(1):67–89.
- 485 Steinrücken, M., Spence, J. P., Kamm, J. A., Wiecek, E., and Song, Y. S. (2018). Model-  
486 based detection and analysis of introgressed Neanderthal ancestry in modern humans. *Molecular*  
487 *Ecology*, 27(19):3873–3888.
- 488 Stringer, C. (2003). Out of Ethiopia. *Nature*, 423(6941):692.
- 489 Stringer, C. and Galway-Witham, J. (2017). Palaeoanthropology: On the origin of our species.  
490 *Nature*, 546(7657):212–214.
- 491 Töpf, A. L., Gilbert, M. T. P., Dumbacher, J. P., and Hoelzel, A. R. (2005). Tracing the Phy-  
492 logeography of Human Populations in Britain Based on 4th11th Century mtDNA Genotypes.  
493 *Molecular Biology and Evolution*, 23(1):152–161.
- 494 Trejaut, J. (2005). Mitochondrial dna provides a link between polynesians and indigenous taiwanese.  
495 *PLOS Biology*, 3(8).
- 496 van de Loosdrecht, M., Bouzouggar, A., Humphrey, L., Posth, C., Barton, N., Aximu-Petri, A.,  
497 Nickel, B., Nagel, S., Talbi, E. H., El Hajraoui, M. A., Amzazi, S., Hublin, J.-J., Pääbo, S.,  
498 Schiffels, S., Meyer, M., Haak, W., Jeong, C., and Krause, J. (2018). Pleistocene North African  
499 genomes link Near Eastern and sub-Saharan African human populations. *Science*, 360(6388):548–  
500 552.

- 501 Veeramah, K. R. and Hammer, M. F. (2014). The impact of whole-genome sequencing on the  
502 reconstruction of human population history. *Nature Reviews Genetics*, 15(3):149–162.
- 503 Vigilant, L., Stoneking, M., Harpending, H., Hawkes, K., and Wilson, A. C. (1991). African  
504 populations and the evolution of human mitochondrial DNA. *Science*, 253(5027):1503–1507.
- 505 Warren, M. (2019). Biggest Denisovan fossil yet spills ancient humans secrets. *Nature*, 569(7754):16–  
506 17.
- 507 Wolpoff, M. H., Hawks, J., and Caspari, R. (2000). Multiregional, not multiple origins. *American*  
508 *Journal of Physical Anthropology*, 112(1):129–136.

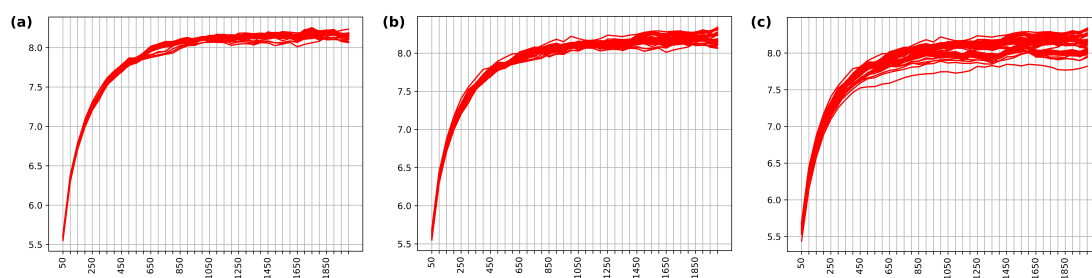

Figure 1: Shannon entropy of (a)  $GFP_{RY}$ , (b)  $GFP_{SW}$ , and (c)  $GFP_{MK}$  of different human mtDNA for all the values of  $L$  from 50 to 2000.

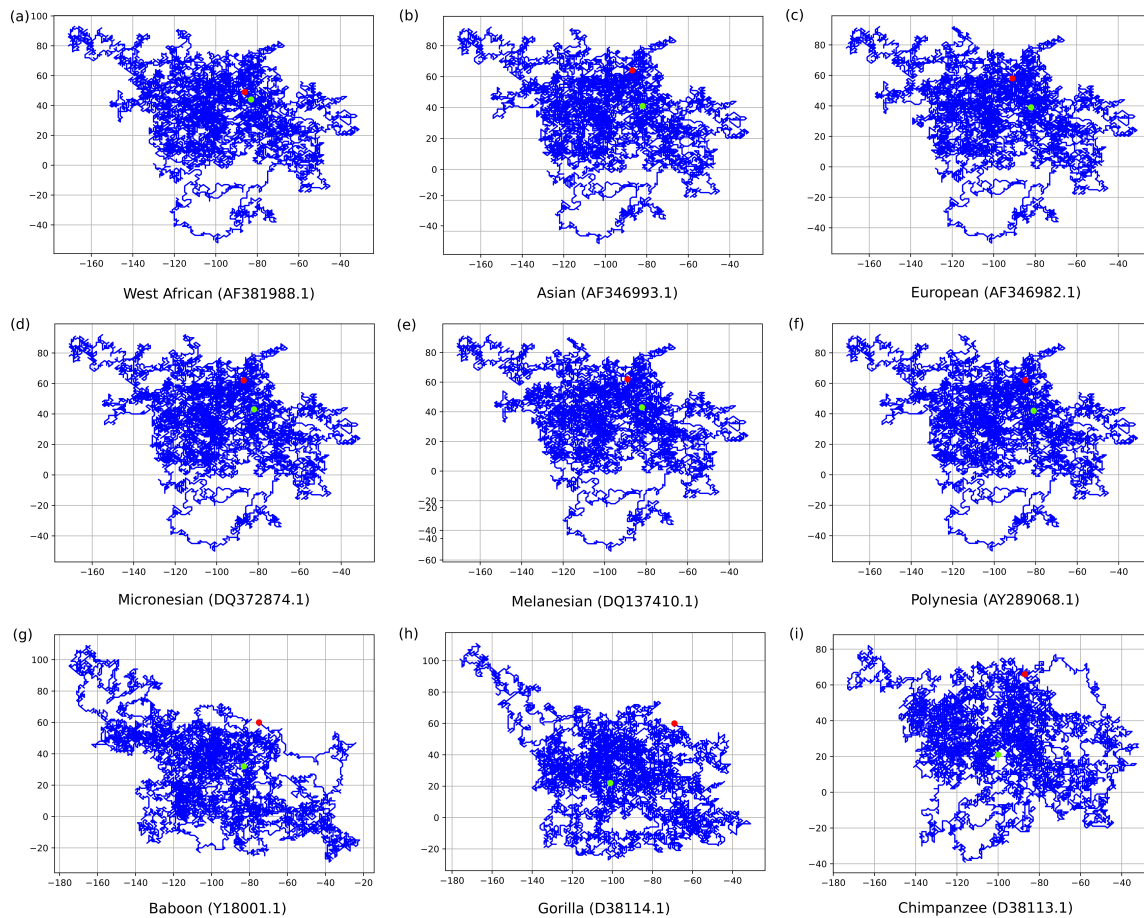

Figure 2: The sequence of drifts of different sample, mentioned under each graph, for the case when we consider the Purine and Pyrimidine as 2D coordinates space. The accession numbers of the corresponding samples are mentioned within the bracket. The start and end positions of the sequence of drifts are denoted by the green and red dots, respectively. The drift sequences of the Baboon, Gorilla, and Chimpanzee (g,h,i) are much different from the drift sequences of human (a-f). The drift sequences of the mtDNA of the population of the western Africa (a) are slightly different from the drift sequences of the other humans (b-f). The differences are visible to the naked eye at the starting (green dot) and end points (red dot) of the drift sequences.

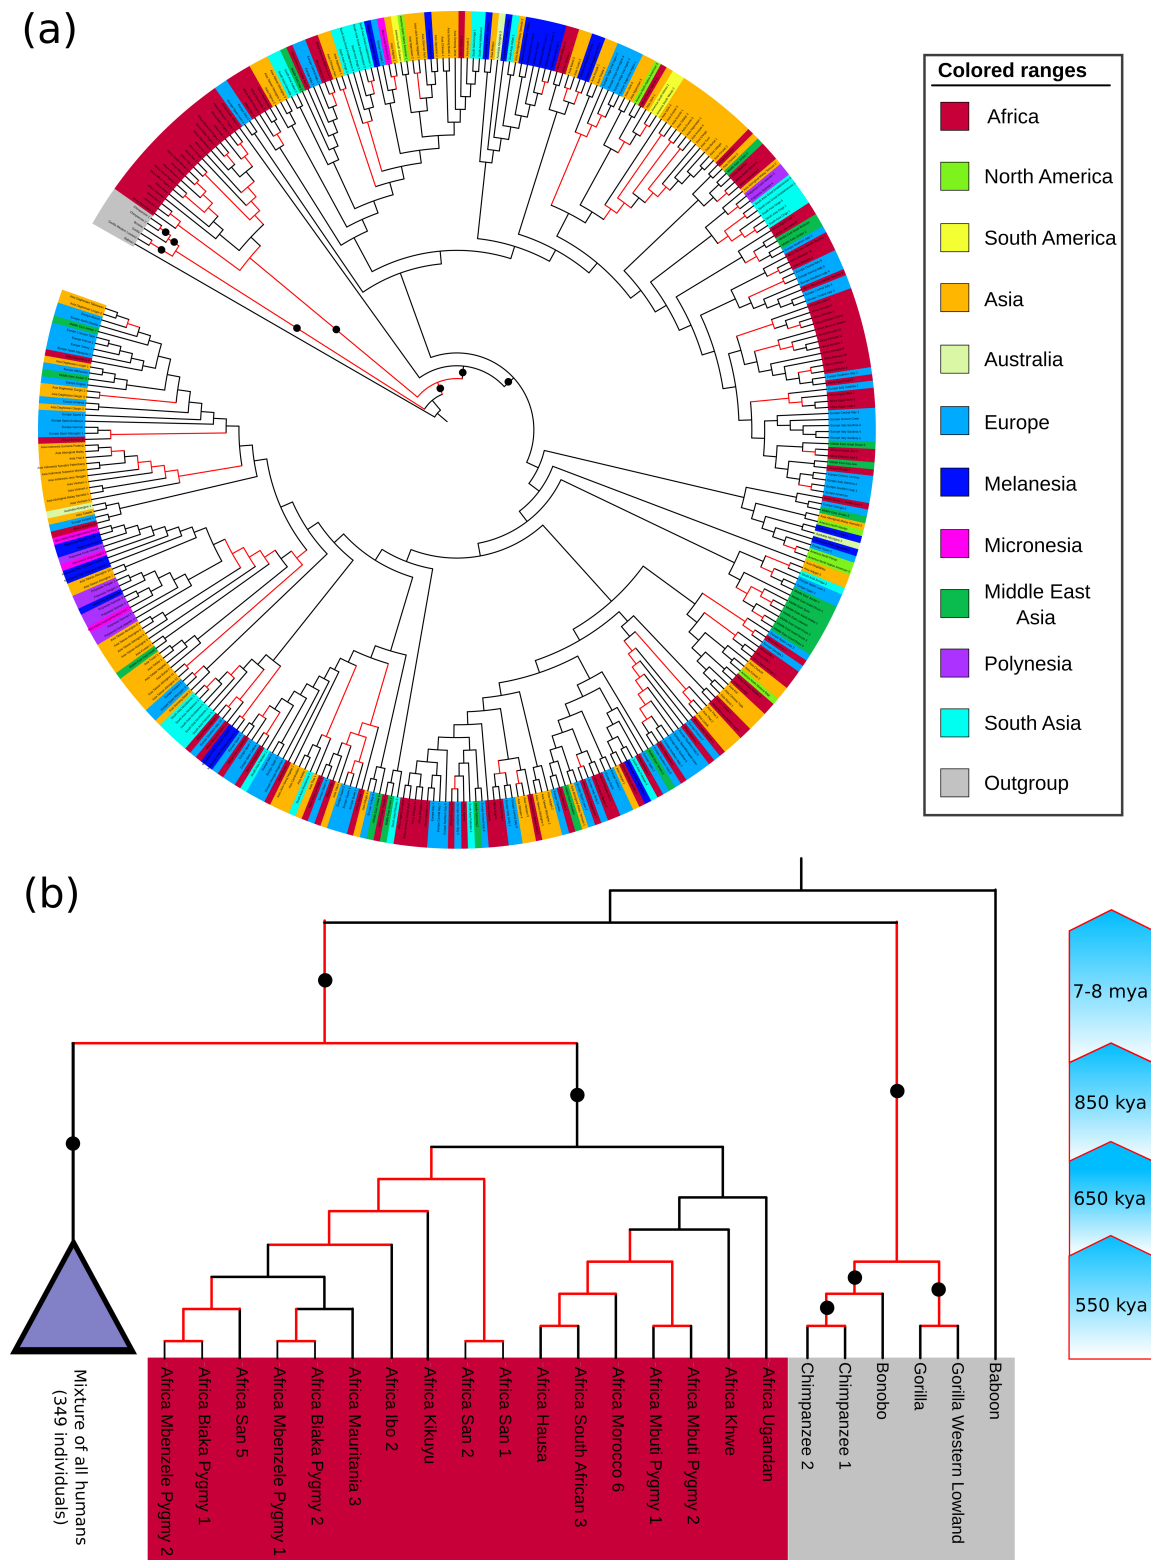

Figure 3: The derived trees using GRAFree. The black dots on the edges denote a high bootstrap support ( $\geq 75\%$ ) of the corresponding clade. The edge marked as red color denotes that the robustness of the clade with respect to the hyper parameters is greater than 80%. (a) Tree derived after merging all three trees using ASTRAL. (b) The summarization of the tree having bootstrap support  $\geq 75\%$ .

Table 1: Summary of the observations

|                         | Observations                                                                                                                                                                                                                                                                                                                                            | Bootstrap support | Robustness | Conclusion                                                                                                                                                               |
|-------------------------|---------------------------------------------------------------------------------------------------------------------------------------------------------------------------------------------------------------------------------------------------------------------------------------------------------------------------------------------------------|-------------------|------------|--------------------------------------------------------------------------------------------------------------------------------------------------------------------------|
| African population      | <ul style="list-style-type: none"> <li>There is a common ancestor of the African population from western and central parts.</li> <li>The origin of this ancestor is estimated to be much earlier than the fossils identified till date.</li> </ul>                                                                                                      | Very high         | Very high  | <ul style="list-style-type: none"> <li>Supports the presence of “African Neanderthals”.</li> <li>Origin of human was in the west and central parts of Africa.</li> </ul> |
| Out of Africa migration | <ul style="list-style-type: none"> <li>Out-of-Africa migration occurred almost 550 kya.</li> </ul>                                                                                                                                                                                                                                                      | Very high         | Very high  | <ul style="list-style-type: none"> <li>Humans were widespread than that of reported till date.</li> </ul>                                                                |
| World populations       | <ul style="list-style-type: none"> <li>Very mixed representation of humans from different community.</li> </ul>                                                                                                                                                                                                                                         | Low               | Very high  | <ul style="list-style-type: none"> <li>A very high admixture within different community of the world.</li> </ul>                                                         |
| Small communities       | <ul style="list-style-type: none"> <li>Asian populations are closely related to the African population.</li> <li>The eastern and the north-eastern Africans are closely placed with both the Asian and the European populations.</li> <li>The Pacific islanders (Oceania), such as Micronesia, Melanesia, and Polynesia are closely related.</li> </ul> | Low               | Very high  |                                                                                                                                                                          |
